# Supplementary material for: Antibodies to Plasmodium falciparum merozoite surface protein-1p19 malaria vaccine candidate induce antibody-dependent respiratory burst in human neutrophils
Source: Springer Nature journal article supplement (doi:10.1186/s12936-015-0935-5), 2015-10-15

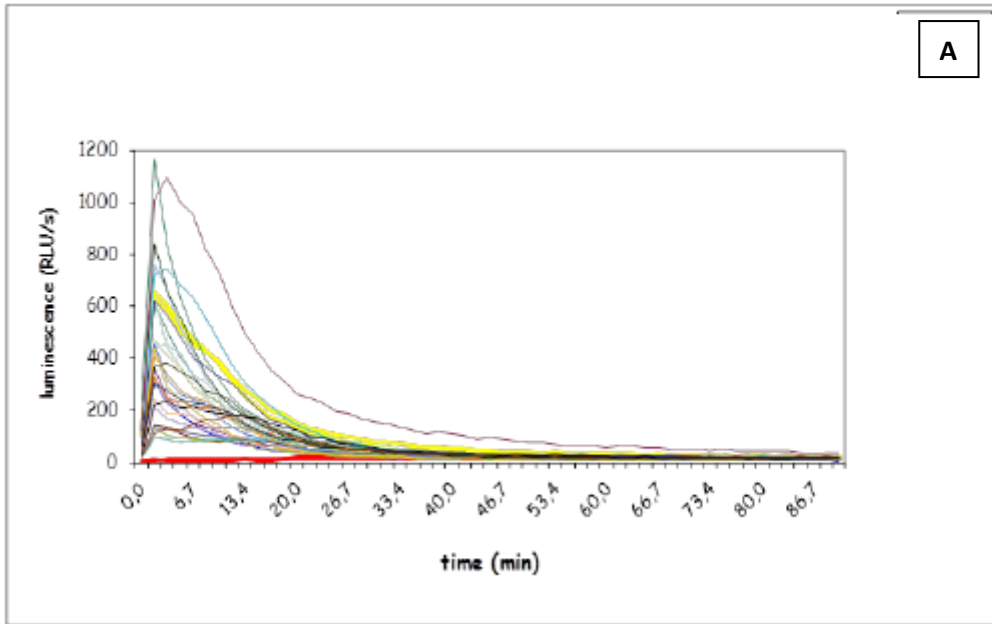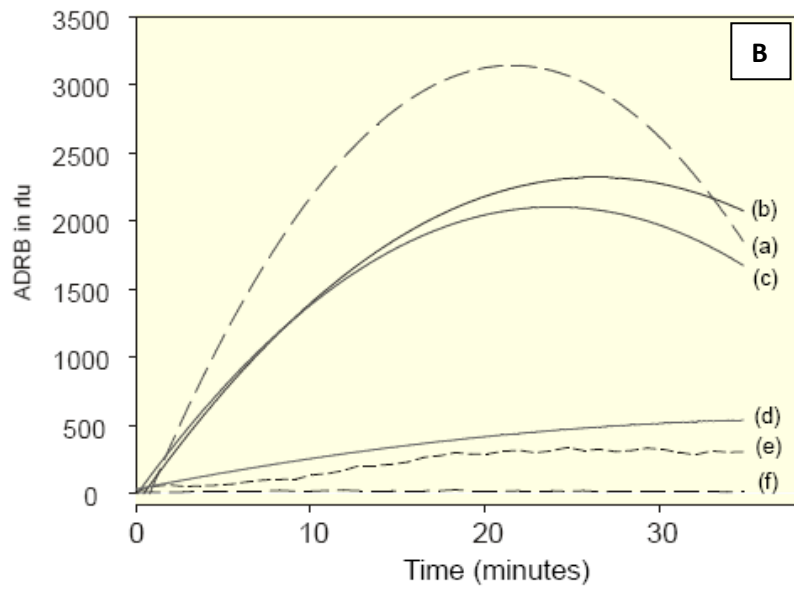

Supplement: MOESM1 [file 9761736]
